# Supplementary material for: Programmable adenine deamination in bacteria using a Cas9–adenine-deaminase fusion
Source: PubMed Central journal article supplement — Chem Sci. 2020 Jan 6;11(6):1657–64. doi: 10.1039/c9sc03784e (PMC7069399; doi:10.1039/c9sc03784e), 2020-01-06
Supplement: SC-011-C9SC03784E-s001.pdf [file SC-011-C9SC03784E-s001.pdf]

Electronic Supplementary Material (ESI) for Chemical Science

## **Programmable Adenine Deamination in Bacteria Using a Cas9-**

### **Adenine-Deaminase Fusion**

Ya Zhang<sup>a,b</sup>, Hongyuan Zhang<sup>a,b</sup>, Zhipeng Wang<sup>a,b</sup>, Zhaowei Wu<sup>a</sup>, Yu Wang<sup>c</sup>, Na Tang<sup>a,b</sup>, Xuexia Xu<sup>d,e</sup>,  
Suwen Zhao<sup>d,e</sup>, Weizhong Chen<sup>\*a</sup>, and Qianjiang Ji<sup>\*a</sup>

<sup>a</sup>School of Physical Science and Technology, ShanghaiTech University, Shanghai 201210, China.

<sup>b</sup>University of Chinese Academy of Sciences, Beijing, 100049, China.

<sup>c</sup>College of Life Science and Engineering, Jiangxi Agricultural University, Nanchang 330045, China.

<sup>d</sup>Human Institute, ShanghaiTech University, Shanghai 201210, China.

<sup>e</sup>School of Life Science and Technology, ShanghaiTech University, Shanghai 201210, China.

## **Table of Contents**

- 1 Detailed protocol for adenine base editing in *S. aureus* and *E. coli*
- 2 Supporting Figures
- 3 Supporting Tables
- 4 Supporting References

# 1 Detailed protocol for adenine base editing in *S. aureus* and *E. coli*

1.1 All the editing plasmids (except for the multiplex genome editing) were constructed using the following protocol:

## (1) Design of the Oligos

Select a 20 bp-spacer sequence before a NGG PAM and two oligos were designed in the following form:

Forward oligo: 5'-gaaaNNNNNNNNNNNNNNNNNNNNNN-3'

Reverse oligo: 3'-NNNNNNNNNNNNNNNNNNNNNcaa-5'

## (2) Phosphorylation of the oligos

|                                   |            |
|-----------------------------------|------------|
| 10X T4 DNA ligase buffer (NEB)    | 5 $\mu$ L  |
| Oligo F (50 $\mu$ M)              | 2 $\mu$ L  |
| Oligo R (50 $\mu$ M)              | 2 $\mu$ L  |
| T4 polynucleotide kinase (Takara) | 1 $\mu$ L  |
| ddH <sub>2</sub> O                | 40 $\mu$ L |
| <hr/>                             |            |
|                                   | 50 $\mu$ L |

Incubate the solution at 37 °C for one hour.

## (3). Annealing of the oligos

2.5  $\mu$ L of 1 M NaCl solution was added to the phosphorylated oligos. The solution was incubated at 95 °C for 3 min. The solution was slowly cooled down to room temperature using a thermo cycler (BIO-RAD, C1000 Touch). Next, the solution containing the annealed oligos was diluted by 20 times.

## (4). Golden gate assembly

|                                    |             |
|------------------------------------|-------------|
| 10X T4 DNA ligase buffer (NEB)     | 1 $\mu$ L   |
| pABE plasmid (100 fmol/ $\mu$ L)   | 0.2 $\mu$ L |
| annealed oligos (20 fmol/ $\mu$ L) | 1 $\mu$ L   |
| T4 DNA ligase (NEB)                | 0.5 $\mu$ L |
| BsaI-HF (NEB)                      | 0.5 $\mu$ L |
| ddH <sub>2</sub> O                 | 6.8 $\mu$ L |
| <hr/>                              |             |
|                                    | 10 $\mu$ L  |

Run the above reaction to insert the annealed oligos into the pABE plasmid using the following protocol

| Temperature (°C) | Time (min) |             |
|------------------|------------|-------------|
| 37               | 3          | } 25 cycles |
| 16               | 4          |             |
| 50               | 5          |             |
| 80               | 15         |             |
| 10               | $\infty$   |             |

## 1.2 Multiplex genome editing plasmid was constructed using the following protocol:

(1). Amplification of sgRNA cassette from pABE-murR3.

(2). Restriction enzyme digestion (XbaI/ XhoI) of pABE-C46-4 and PCR products of sgRNA cassette.

|                               |             |
|-------------------------------|-------------|
| 10X CutSmart buffer (NEB)     | 5 $\mu$ L   |
| DNA                           | 40 $\mu$ L  |
| XbaI Restriction enzyme (NEB) | 2.5 $\mu$ L |
| XhoI Restriction enzyme (NEB) | 2.5 $\mu$ L |
| <hr/>                         |             |
|                               | 50 $\mu$ L  |

The enzyme-digested products were purified by gel extraction.

(5). T4 DNA ligase reaction.

|                                       |             |
|---------------------------------------|-------------|
| 10X T4 DNA ligase buffer (NEB)        | 1 $\mu$ L   |
| pABE-C46-4 plasmid (10 fmol/ $\mu$ L) | 1 $\mu$ L   |
| sgRNA (50 fmol/ $\mu$ L)              | 1 $\mu$ L   |
| T4 DNA ligase (NEB)                   | 0.5 $\mu$ L |
| ddH <sub>2</sub> O                    | 6.5 $\mu$ L |
| <hr/>                                 |             |
|                                       | 10 $\mu$ L  |

The reaction mixture was placed at room temperature for 1 h.

### 1.2 Transformation

The product was transformed into 100  $\mu$ L *E. coli* DH5 $\alpha$  competent cells and the cells were plated onto a LB agar plate containing 50  $\mu$ g/ml kanamycin. The plate was incubated at 30  $^{\circ}$ C for 24 h. The successful construction of the plasmid was confirmed by PCR, enzyme digestion, and sequencing.

### 1.3 Adenine base editing

See the detailed procedures in the “Adenine base editing” section of the Methods part.

## 2 Supporting Figures

**Figure S1.** pABE enabled highly efficient adenine to guanine conversion in the *S. aureus* RN4220 strain. (A) A36 of the *agrA* gene was synonymously mutated with an efficiency of 3/4 using pABE. (B) M37 of the *murR* gene was mutated to V with an efficiency of 4/8 using pABE.

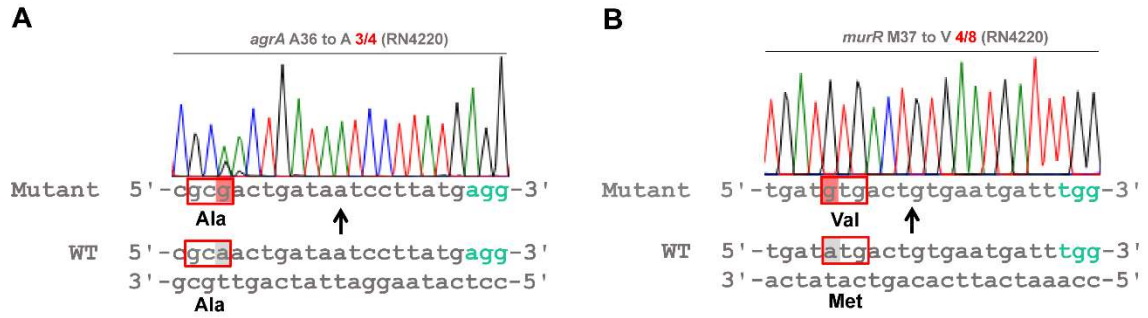

**Figure S2.** pABE enabled highly efficient adenine to guanine conversion in clinically isolated *S. aureus* strains Newman and N315. (A) S55 of the *cntA* gene in the Newman strain was mutated to P with an efficiency of 8/8. (B) L77 of the *cntA* gene in the Newman strain was synonymously mutated with an efficiency of 6/7. (C) S55 of the *cntA* gene in the N315 strain was mutated to P with an efficiency of 7/8. (D) N83 of the *murR* gene in the N315 strain was synonymously mutated with an efficiency of 8/8.

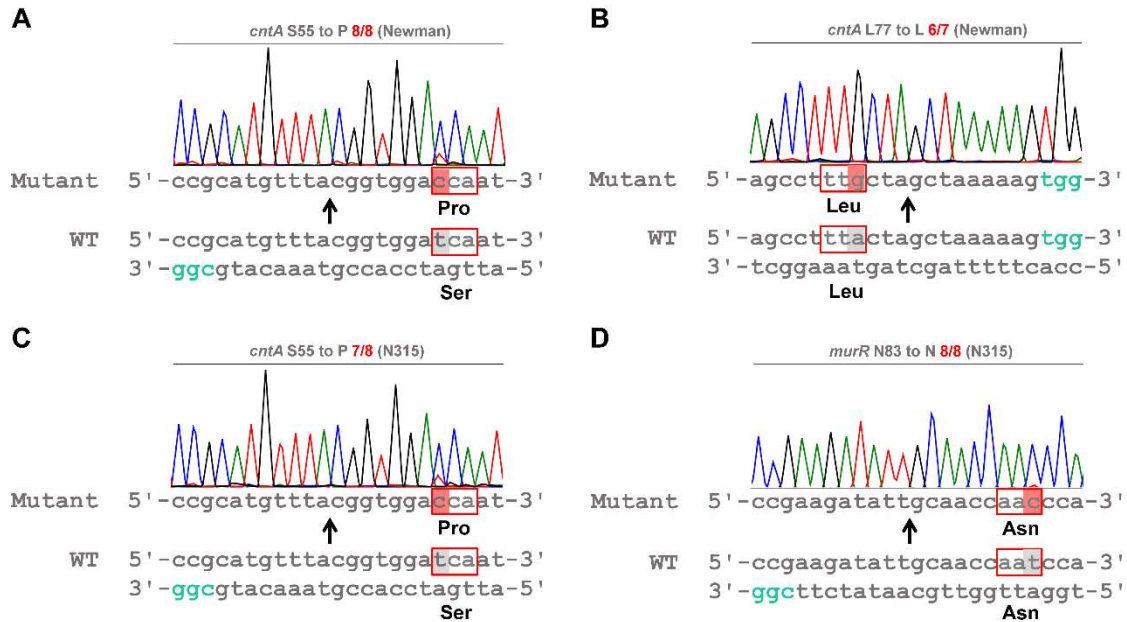

**Figure S3.** The editable window of pABE in *S. aureus*. The As at the positions from 4 to 8 were edited with the efficiencies of 5/8, 5/7, 8/8, 4/8 and 8/8, respectively. The As at the positions of 2, 3, 9, and 10 could not be edited by pABE.

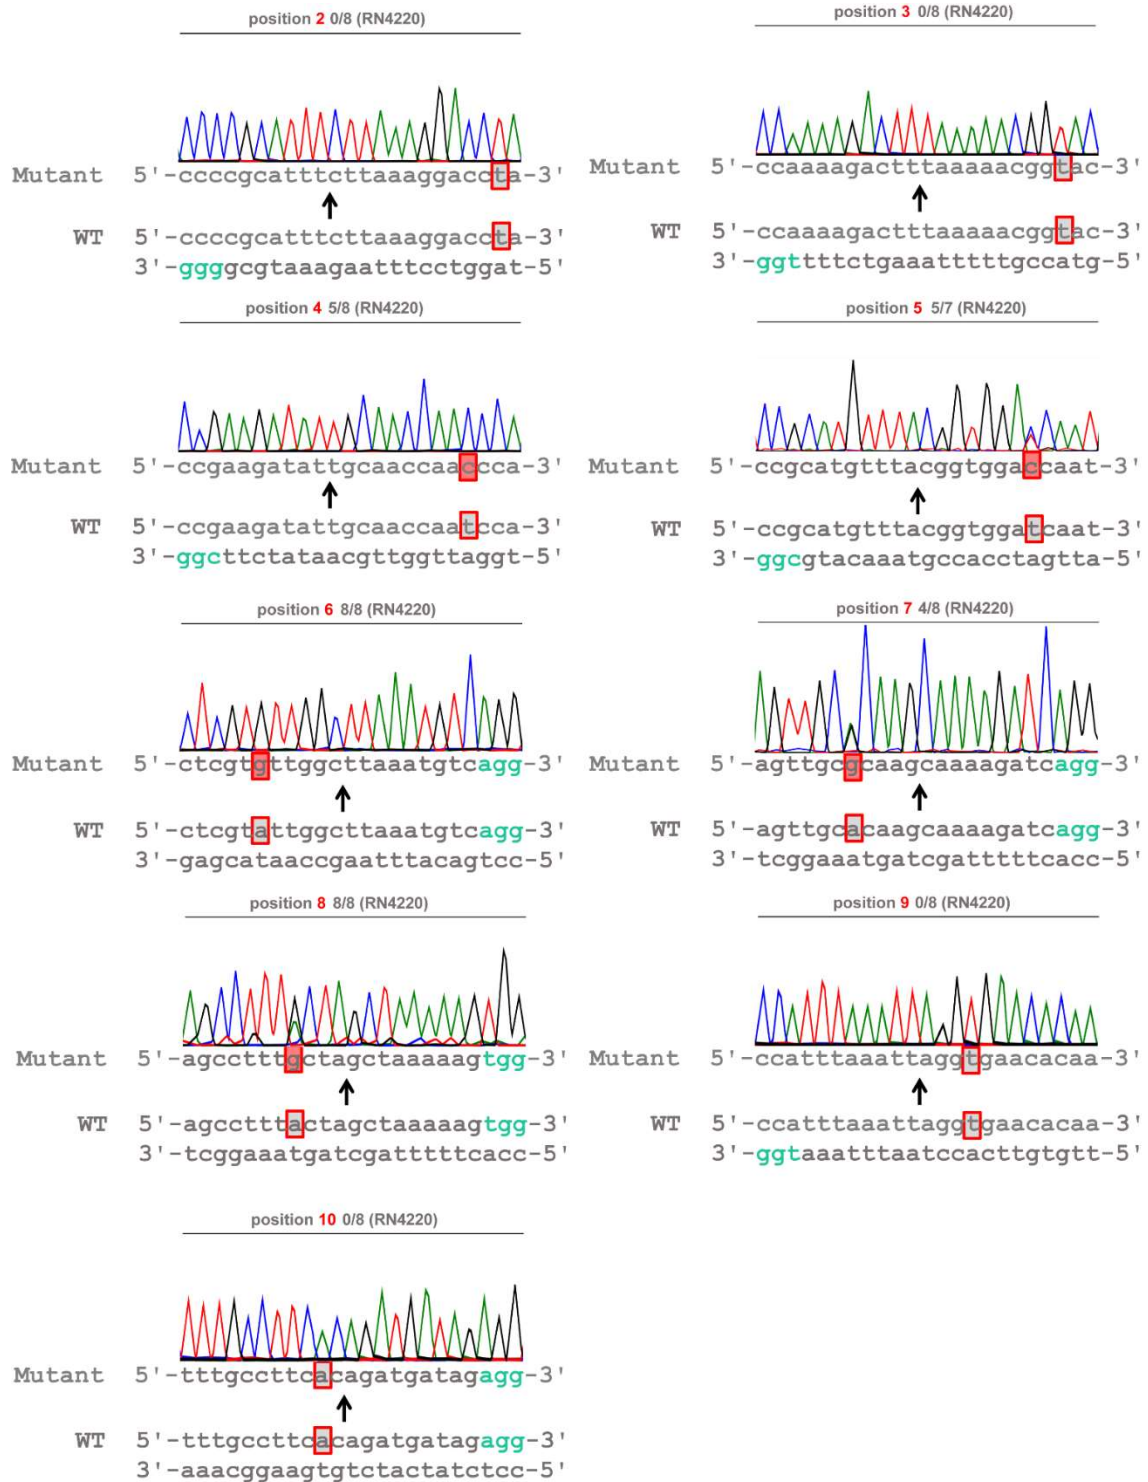

**Figure S4.** pABE enabled highly efficient adenine to guanine conversion in *E. coli* MG1655 strain. R38 of the *lacZ* gene in the MG1655 strain was synonymously mutated to R with an efficiency of 8/8.

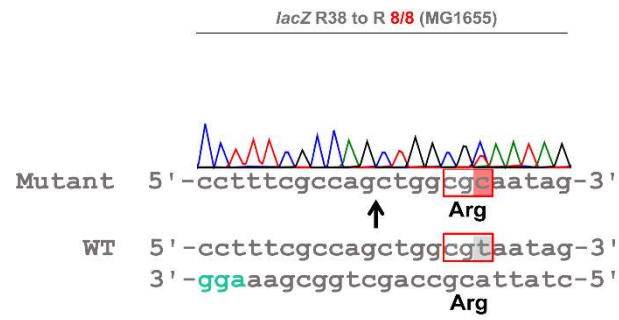



**Figure S5.** pABE enabled highly efficient adenine to guanine conversion in multiplex gene editing in the *S. aureus* RN4220 strain. D193 of *cntC* gene and A141 of *murR* gene were simultaneously mutated.

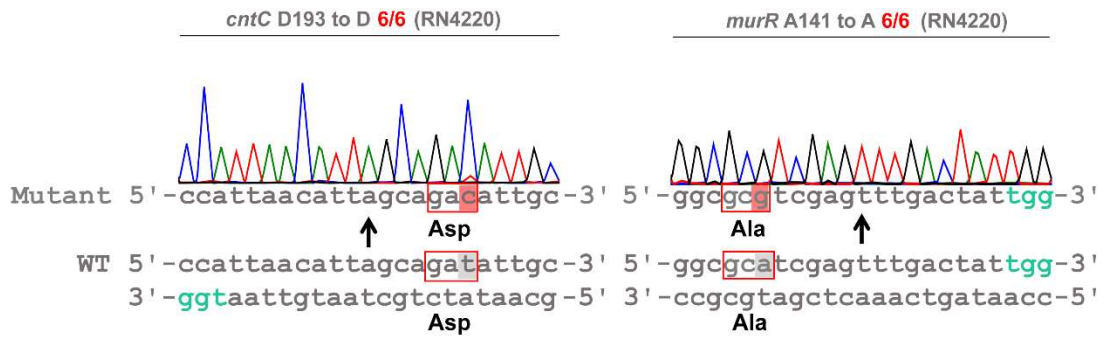

**Figure S6.** Five editable sites from 4 spacers in the *S. aureus* RN4220 strain were chosen to evaluate the unbiased editing efficiency of pABE via deep sequencing. Each site was read 50 thousand times.

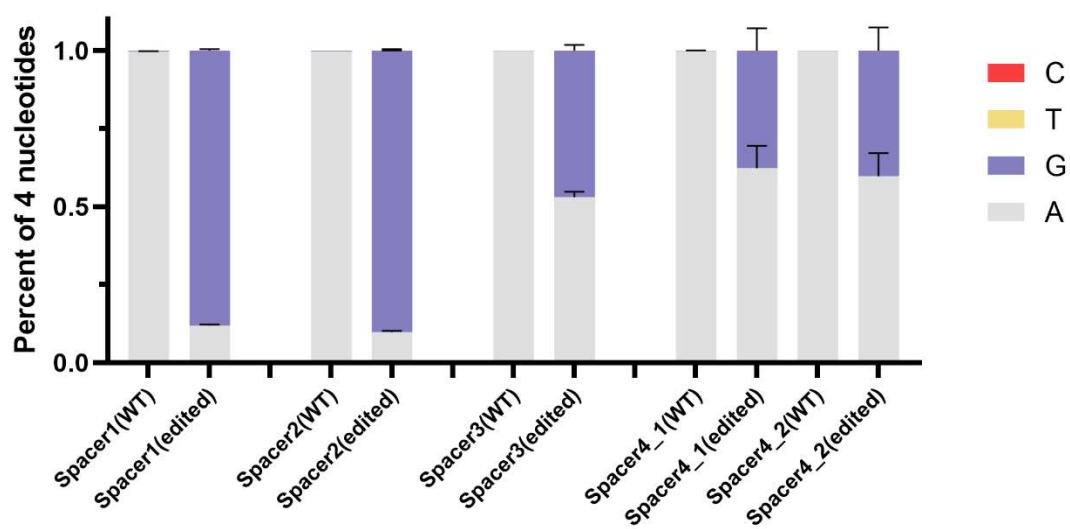

**Figure S7.** Thirty-eight spacers targeting 42 different sites of *cntBC* using pABE. The editable spacers were shown in boxes. The four key residues were highlighted.

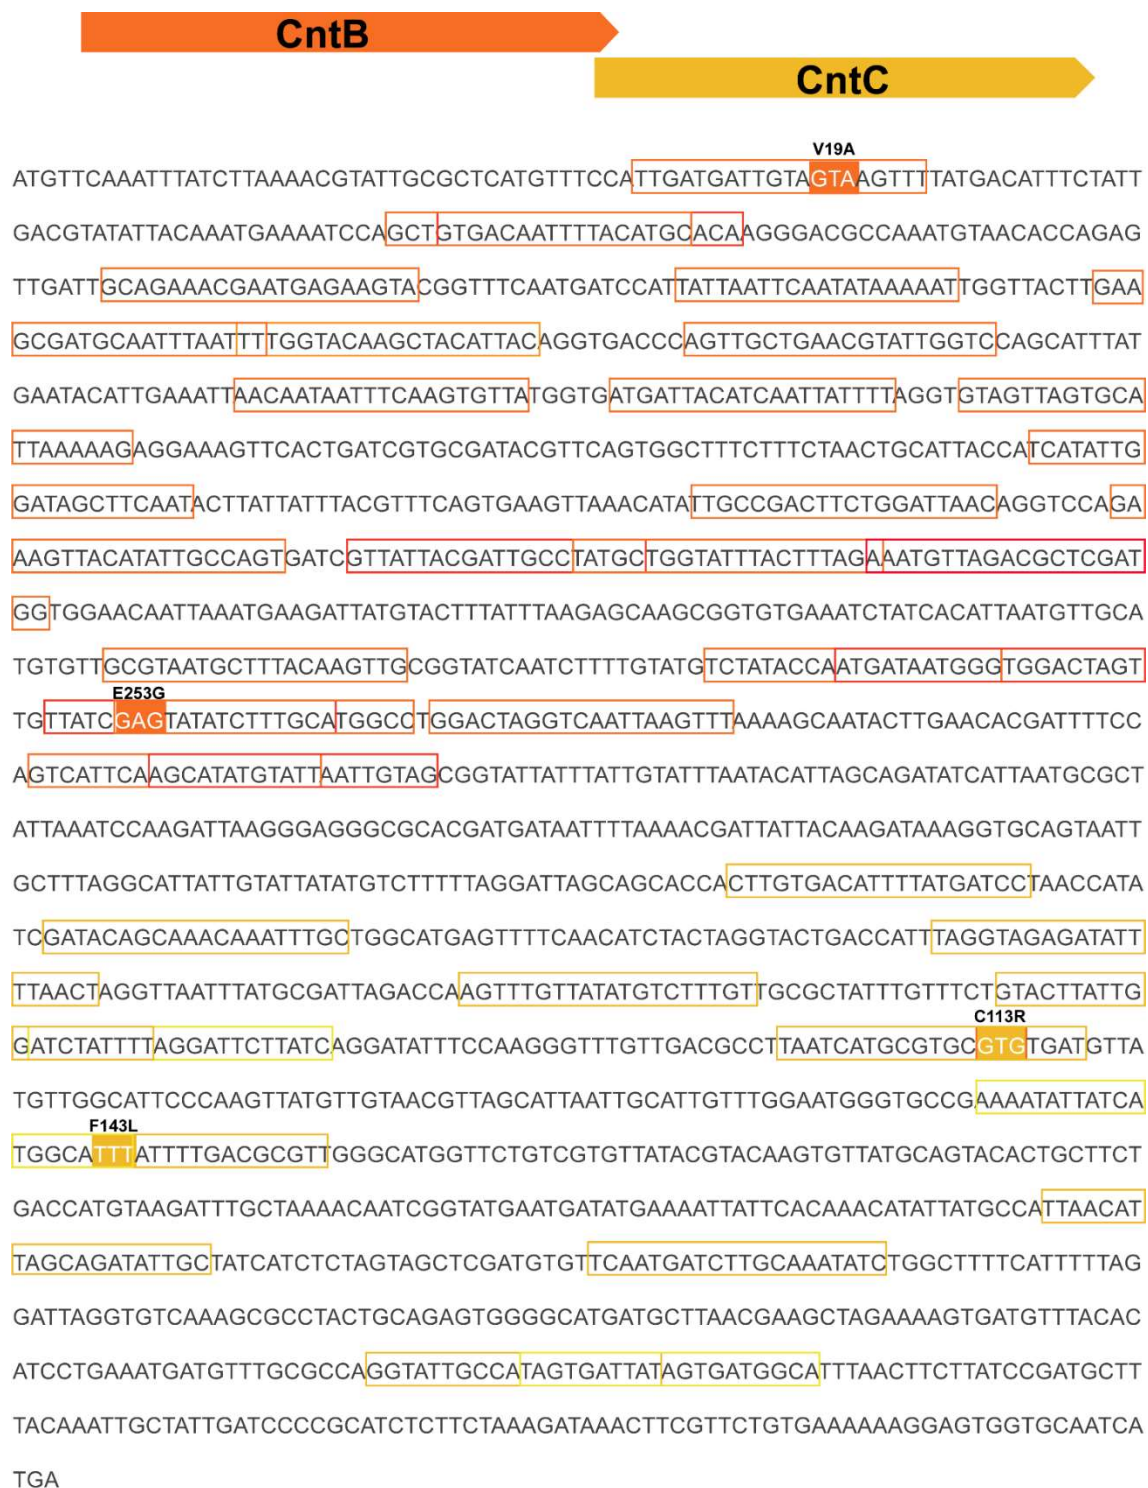

**Figure S8.**  $\text{Co}^{2+}$  accumulation measurements of various RN4220 strains by ICP-OES. Assays were performed in the presence of  $0.5 \mu\text{M}$   $\text{Co}^{2+}$ . The detection limit of ICP-OES is 26260 atoms/CFU. The  $P$  values are calculated from Student's  $t$  test.

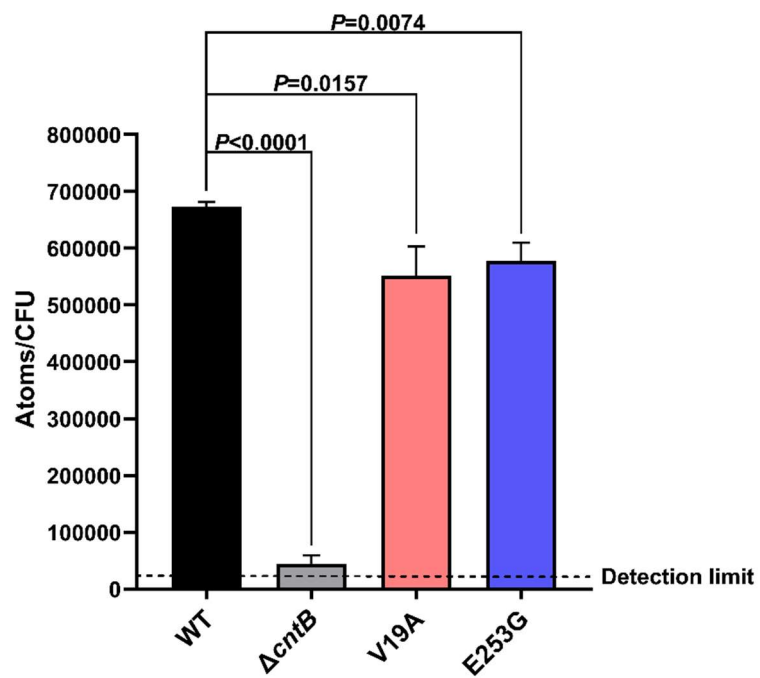

### 3 Supporting Tables

Table S1. Proportion of 4 nucleotides in edited sites measured via high-throughput sequencing. Each site was read 50 thousand times. Sequencing was repeated three times.

|         | Edited Site | Strain Type | Nucleotide Type | Average Percentage | Standard Deviation |
|---------|-------------|-------------|-----------------|--------------------|--------------------|
| SPACER1 | 6th         | WT          | A               | 0.99726            | 0.00011            |
|         |             |             | T               | 0.00007            | 0.00004            |
|         |             |             | G               | 0.00265            | 0.00011            |
|         |             |             | C               | 0.00002            | 0.00002            |
|         |             | Edited      | A               | 0.11846            | 0.00425            |
|         |             |             | T               | 0.00010            | 0.00002            |
|         |             |             | G               | 0.88144            | 0.00423            |
|         |             |             | C               | 0.00000            | 0.00000            |
| SPACER2 | 6th         | WT          | A               | 0.99775            | 0.00015            |
|         |             |             | T               | 0.00006            | 0.00004            |
|         |             |             | G               | 0.00215            | 0.00016            |
|         |             |             | C               | 0.00004            | 0.00003            |
|         |             | Edited      | A               | 0.09805            | 0.00416            |
|         |             |             | T               | 0.00005            | 0.00001            |
|         |             |             | G               | 0.90177            | 0.00402            |
|         |             |             | C               | 0.00012            | 0.00016            |
| SPACER3 | 8th         | WT          | A               | 0.99882            | 0.00006            |
|         |             |             | T               | 0.00002            | 0.00002            |
|         |             |             | G               | 0.00112            | 0.00001            |
|         |             |             | C               | 0.00004            | 0.00007            |
|         |             | Edited      | A               | 0.53012            | 0.01772            |
|         |             |             | T               | 0.00005            | 0.00003            |
|         |             |             | G               | 0.46980            | 0.01772            |
|         |             |             | C               | 0.00003            | 0.00003            |
| SPACER4 | 5th         | WT          | A               | 0.99887            | 0.00018            |
|         |             |             | T               | 0.00001            | 0.00001            |
|         |             |             | G               | 0.00109            | 0.00015            |
|         |             |             | C               | 0.00003            | 0.00004            |
|         |             | Edited      | A               | 0.62313            | 0.07100            |
|         |             |             | T               | 0.00005            | 0.00003            |
|         |             |             | G               | 0.37678            | 0.07098            |
|         |             |             | C               | 0.00004            | 0.00005            |
|         | 7th         | WT          | A               | 0.99852            | 0.00016            |
|         |             |             | T               | 0.00004            | 0.00002            |
|         |             |             | G               | 0.00129            | 0.00014            |
|         |             |             | C               | 0.00015            | 0.00004            |
| Edited  | A           | 0.59754     | 0.07395         |                    |                    |
|         | T           | 0.00011     | 0.00010         |                    |                    |
|         | G           | 0.40229     | 0.07388         |                    |                    |
|         | C           | 0.00007     | 0.00002         |                    |                    |

Table S2. List of possible off-target sites.

| Target    | Mismatch | Sequence              | PAM |
|-----------|----------|-----------------------|-----|
| cntA-S5-2 | 0        | ATTGATCCACCGTAAACATG  | CGG |
| Off_1     | 9        | TCATACAGACGTTAAACATG  | TGG |
| Off_2     | 12       | CAAAGAATGATTAAACATG   | TGG |
| Off_3     | 10       | AAATTATATTTGTAACATG   | TGG |
| Off_4     | 10       | TATCCAACCTGCTAAACATG  | AGG |
| Off_5     | 9        | CACATGCAATCATAAACATG  | TGG |
| Off_6     | 12       | TGCCTCTGTTAATAAACATG  | CAG |
| Off_7     | 10       | TTGTTCAAGATGTAACATG   | GAG |
| Off_8     | 7        | TTCCATCTTCTCTAAACATG  | CAG |
| Off_9     | 8        | AATAATAAGTATTAACATG   | CAG |
| Off_10    | 8        | TTTATTGAAAGATAAACATG  | TAG |
| Off_11    | 10       | AGATGCCATTGCTAAACATG  | TAG |
| Off_12    | 9        | AAGAACTCGTGCTAAACATG  | AAG |
| Off_13    | 11       | GGATAAGGTTATTAACATG   | CAG |
| Off_14    | 7        | GATGAAGGCACGTAACATG   | AAG |
| Off_15    | 8        | AGCAGCCAATCCTAAACATG  | GAG |
| Off_16    | 10       | ACATGCTTTGGGTAACATG   | TAG |
| Off_17    | 8        | TTTAACAATAATTAACATG   | CAG |
| Off_18    | 10       | CGCATTCGTTAATAAACATG  | TAG |
| Off_19    | 11       | AACACAATTTGTTAAACATG  | GAG |
| Off_20    | 8        | GTTGCATGCTGTAACATG    | TGA |
| Off_21    | 9        | ACAAAACCTTAATAAACATG  | AGA |
| Off_22    | 10       | TATTAATATTATTAACATG   | AGA |
| Off_23    | 8        | AAAGATTGTGATTAACATG   | GGA |
| Off_24    | 10       | CACTACAAATGTTAAACATG  | CGA |
| Off_25    | 9        | AAGTTTCGGTTTTAAACATG  | GGA |
| Off_26    | 10       | TATCAAAATCATTAACATG   | GGA |
| Off_27    | 10       | TAATGATCATTTTAAACATG  | TGA |
| Target    | Mismatch | Sequence              | PAM |
| murR-S6   | 0        | CTCGTATTGGCTTAAATGTC  | AGG |
| Off_1     | 11       | GGTCCGGCGATGTAATGTC   | GGG |
| Off_2     | 9        | TCAACCTTTTAGTAAATGTC  | AGG |
| Off_3     | 8        | ATTTAATGATGTTAAATGTC  | GGG |
| Off_4     | 11       | TTACCTAAAATAAATGTC    | TGG |
| Off_5     | 9        | AAAAATCGGGCATAAATGTC  | AGG |
| Off_6     | 9        | GGGTAGGTGCATAAATGTC   | GAG |
| Off_7     | 9        | CACTCGGTTTCAGTAAATGTC | CAG |
| Off_8     | 9        | TCCTTAAACAAAATAAATGTC | CGA |
| Off_9     | 9        | TATGCTGTGTAATAAATGTC  | TGA |
| Off_10    | 8        | GACATCTCATTTTAAATGTC  | AGA |
| Off_11    | 10       | TGTAAGGGGCTTTAAATGTC  | AGA |

Table S3. Bacterial strain used in this study

| Bacterial strain          | Description                                                                                                                                                      | Reference  |
|---------------------------|------------------------------------------------------------------------------------------------------------------------------------------------------------------|------------|
| E.coli                    |                                                                                                                                                                  |            |
| DH5α                      | F-φ80 <i>lacZ</i> ΔM15 Δ( <i>lacZYA</i> -argF) U169 <i>endA1 recA1</i><br><i>hsdR17</i> (rk-,mk+) <i>supE44</i> λ-thi-1 <i>gyrA96</i> <i>relA1 phoA</i>          | Lab stock  |
| DH5α-Δ <i>lacZ</i>        | DH5α Δ <i>lacZ</i>                                                                                                                                               | Lab stock  |
| DH5α- <i>spmurR</i> -SA   | DH5α <i>murR</i> N266 mutation to N and D267 mutation to D                                                                                                       | This study |
| DC10B                     | F- <i>endA1 recA1 galU galk deoR nupG rpsL ΔlacX74</i> Φ80 <i>lacZ</i> ΔM15<br><i>araD139</i> Δ( <i>ara,leu</i> )7697 <i>mcrA</i> Δ( <i>mrr-hsdRMS-mcrBC</i> ) λ | Lab stock  |
| MG1655                    | K12 F- lambda- <i>ilvG</i> - <i>rfb</i> -50 <i>rph</i> -1                                                                                                        | Lab stock  |
| MG1655- <i>lacZ</i> -S6   | MG1655 <i>lacZ</i> R38 mutation to R                                                                                                                             | This study |
| MG1655- <i>yagI</i> -S6   | MG1655 <i>yagI</i> D15 mutation to G                                                                                                                             | This study |
| MG1655- <i>lacZ</i> -SC   | MG1655 <i>lacZ</i> Q51 mutation to stop codon                                                                                                                    | This study |
| <i>S. aureus</i>          |                                                                                                                                                                  |            |
| RN4220                    | Restriction-deficient transformation recipient                                                                                                                   | Lab stock  |
| RN4220- <i>agrA1</i>      | RN4220 <i>agrA</i> I26 mutation to V                                                                                                                             | This study |
| RN4220- <i>agrA2</i>      | RN4220 <i>agrA</i> A36 mutation to A                                                                                                                             | This study |
| RN4220- <i>agrA3</i>      | RN4220 <i>agrA</i> K77 mutation to E                                                                                                                             | This study |
| RN4220- <i>murR1</i>      | RN4220 <i>murR</i> M37 mutation to V                                                                                                                             | This study |
| RN4220- <i>murR3</i>      | RN4220 <i>murR</i> A141 mutation to A                                                                                                                            | This study |
| RN4220- <i>murR4</i>      | RN4220 <i>murR</i> S52 mutation to S                                                                                                                             | This study |
| RN4220- <i>murR</i> -S4   | RN4220 <i>murR</i> mutation for editing window 4                                                                                                                 | This study |
| RN4220- <i>cntA</i> -S5-2 | RN4220 <i>cntA</i> mutation for editing window 5                                                                                                                 | This study |
| RN4220- <i>murR</i> -S6   | RN4220 <i>murR</i> mutation for editing window 6                                                                                                                 | This study |
| RN4220- <i>sasC</i> -S7   | RN4220 <i>sasC</i> mutation for editing window 7                                                                                                                 | This study |
| RN4220- <i>cntA</i> -S8   | RN4220 <i>cntA</i> mutation for editing window 8                                                                                                                 | This study |
| RN4220-Δ <i>cntB</i>      | RN4220 <i>cntB</i> Q68 mutation to stop codon                                                                                                                    | This study |
| RN4220-Δ <i>cntC</i>      | RN4220 <i>cntC</i> R6 mutation to stop codon                                                                                                                     | This study |
| RN4220-B56-3              | RN4220 <i>cntB</i> N229 mutation to D                                                                                                                            | This study |
| RN4220-B56-2              | RN4220 <i>cntB</i> S153 mutation to P                                                                                                                            | This study |
| RN4220-B4-2               | RN4220 <i>cntB</i> L249 mutation to P                                                                                                                            | This study |
| RN4220-B8-1               | RN4220 <i>cntB</i> R197 mutation to G                                                                                                                            | This study |
| RN4220-B4578-1-1          | RN4220 <i>cntB</i> I107 mutation to M                                                                                                                            | This study |
| RN4220-B4578-1-2          | RN4220 <i>cntB</i> I107 mutation to V                                                                                                                            | This study |
| RN4220-B7-6               | RN4220 <i>cntB</i> E253 mutation to G                                                                                                                            | This study |
| RN4220-B7-6(10)           | RN4220 <i>cntB</i> Y254 mutation to C                                                                                                                            | This study |
| RN4220-B467-1             | RN4220 <i>cntB</i> T37 mutation to T                                                                                                                             | This study |
| RN4220-B7-1               | RN4220 <i>cntB</i> V19 mutation to A                                                                                                                             | This study |
| RN4220-B47-1              | RN4220 <i>cntB</i> T116 mutation to A                                                                                                                            | This study |
| RN4220-B7-4               | RN4220 <i>cntB</i> S124 mutation to G                                                                                                                            | This study |
| RN4220-B7-5               | RN4220 <i>cntB</i> T168 mutation to A                                                                                                                            | This study |

|                              |                                                                                       |                         |
|------------------------------|---------------------------------------------------------------------------------------|-------------------------|
| RN4220-B7-2                  | RN4220 <i>cntB</i> M77 mutation to V                                                  | This study              |
| RN4220-B7-3                  | RN4220 <i>cntB</i> T83 mutation to A                                                  | This study              |
| RN4220-B78-3                 | RN4220 <i>cntB</i> L264 mutation to S                                                 | This study              |
| RN4220-B46-2                 | RN4220 <i>cntB</i> Y280 mutation to C                                                 | This study              |
| RN4220-B568-1-1              | RN4220 <i>cntB</i> I95 mutation to I                                                  | This study              |
| RN4220-B568-1-3              | RN4220 <i>cntB</i> R94 mutation to R                                                  | This study              |
| RN4220-B78-2                 | RN4220 <i>cntB</i> L179 mutation to S                                                 | This study              |
| RN4220-B456-1                | RN4220 <i>cntB</i> F193 mutation to S                                                 | This study              |
| RN4220-B46-1                 | RN4220 <i>cntB</i> I242 mutation to V                                                 | This study              |
| RN4220-B47-2                 | RN4220 <i>cntB</i> I184 mutation to V                                                 | This study              |
| RN4220-B57-1                 | RN4220 <i>cntB</i> Y254 mutation to C                                                 | This study              |
| RN4220-B468-1                | RN4220 <i>cntB</i> Y280 mutation to H and V281 mutation to A                          | This study              |
| RN4220-B56-1                 | RN4220 <i>cntB</i> L66 mutation to L                                                  | This study              |
| RN4220-B567-1                | RN4220 <i>cntB</i> E54 mutation to G                                                  | This study              |
| RN4220-C48-1                 | RN4220 <i>cntC</i> I144 mutation to V                                                 | This study              |
| RN4220-C4-2                  | RN4220 <i>cntC</i> I93 mutation to V                                                  | This study              |
| RN4220-C46-1                 | RN4220 <i>cntC</i> T43 mutation to T                                                  | This study              |
| RN4220-C8-1-4                | RN4220 <i>cntC</i> M141 mutation to T                                                 | This study              |
| RN4220-C8-1-3                | RN4220 <i>cntC</i> F143 mutation to L                                                 | This study              |
| RN4220-C7-1                  | RN4220 <i>cntC</i> I90 mutation to V                                                  | This study              |
| RN4220-C47-2                 | RN4220 <i>cntC</i> V252 mutation to A                                                 | This study              |
| RN4220-C46-4                 | RN4220 <i>cntC</i> D193 mutation to D                                                 | This study              |
| RN4220-C57-1                 | RN4220 <i>cntC</i> I251 mutation to V                                                 | This study              |
| RN4220-C46-2                 | RN4220 <i>cntC</i> C113 mutation to R                                                 | This study              |
| RN4220-C47-1                 | RN4220 <i>cntC</i> I206 mutation to V                                                 | This study              |
| RN4220-C68-2                 | RN4220 <i>cntC</i> R63 mutation to G                                                  | This study              |
| RN4220-C457-1                | RN4220 <i>cntC</i> F81 mutation to L                                                  | This study              |
| RN4220-C58-1                 | RN4220 <i>cntC</i> M256 mutation to T                                                 | This study              |
| RN4220-C68-1                 | RN4220 <i>cntC</i> Y36 mutation to H                                                  | This study              |
| RN4220-V19S                  | RN4220 <i>cntB</i> V19 mutation to S                                                  | This study              |
| RN4220-E253A                 | RN4220 <i>cntB</i> E253 mutation to A                                                 | This study              |
| RN4220-C113A                 | RN4220 <i>cntC</i> C113 mutation to A                                                 | This study              |
| RN4220-F143A                 | RN4220 <i>cntC</i> F143 mutation to A                                                 | This study              |
| RN4220-C46-4-murR3<br>Newman | RN4220 <i>cntC</i> D193 mutation to D and <i>murR</i> A141 mutation to A<br>Wild type | This study<br>Lab stock |
| Newman- <i>cntA</i> -S5      | Newman <i>cntA</i> S55 mutation to P                                                  | This study              |
| Newman- <i>cntA</i> -S8      | Newman <i>cntA</i> L77 mutation to L                                                  | This study              |
| N315                         | Wild type                                                                             | Lab stock               |
| N315- <i>cntA</i> -S5        | N315 <i>cntA</i> S55 mutation to P                                                    | This study              |
| N315- <i>murR</i> -S4        | N315 <i>murR</i> N83 mutation to N                                                    | This study              |



Table S4. Plasmids used in this study

| Plasmids                   | Description                                                                        | Reference  |
|----------------------------|------------------------------------------------------------------------------------|------------|
| pnCasSA-BEC                | S.aureus base editing vector, Kmr, Cmr                                             | 1          |
| pUC57-ABE7.10              | pUC57 derivative containing codon optimized ABE7.10 gene, Ampr                     | This study |
| pABE                       | genome editing vector, Kmr, Cmr                                                    | This study |
| pABE- <i>agrA1</i>         | pABE derivative with <i>agrA</i> spacer, I26 mutation to V                         | This study |
| pABE- <i>agrA2</i>         | pABE derivative with <i>agrA</i> spacer, A36 mutation to A                         | This study |
| pABE- <i>agrA3</i>         | pABE derivative with <i>agrA</i> spacer, K77 mutation to E                         | This study |
| pABE- <i>murR1</i>         | pABE derivative with <i>murR</i> spacer, M37 mutation to V                         | This study |
| pABE- <i>murR3</i>         | pABE derivative with <i>murR</i> spacer, A141 mutation to A                        | This study |
| pABE- <i>murR4</i>         | pABE derivative with <i>murR</i> spacer, S52 mutation to S                         | This study |
| pABE- <i>cymR-S2</i>       | pABE derivative with <i>cymR-S2</i> spacer                                         | This study |
| pABE- <i>cntA-S3</i>       | pABE derivative with <i>cntA-S3</i> spacer                                         | This study |
| pABE- <i>murR-S4</i>       | pABE derivative with <i>murR-S4</i> spacer                                         | This study |
| pABE- <i>cntA-S5-2</i>     | pABE derivative with <i>cntA-S5</i> spacer                                         | This study |
| pABE- <i>murR-S6</i>       | pABE derivative with <i>murR-S6</i> spacer                                         | This study |
| pABE- <i>sasC-S7</i>       | pABE derivative with <i>sasC-S7</i> spacer                                         | This study |
| pABE- <i>cntA-S8</i>       | pABE derivative with <i>cntA-S8</i> spacer                                         | This study |
| pABE- <i>cntA-S9</i>       | pABE derivative with <i>cntA-S9</i> spacer                                         | This study |
| pABE- <i>cntA-S10</i>      | pABE derivative with <i>cntA-S10</i> spacer                                        | This study |
| pABE- <i>lacZ-S6</i>       | pABE derivative with <i>lacZ</i> spacer, R38 mutation to R                         | This study |
| pABE- <i>yagI-S6</i>       | pABE derivative with <i>yagI</i> spacer, D15 mutation to G                         | This study |
| pABE- <i>spmurR-SA</i>     | pABE derivative with <i>murR</i> spacer, N266 mutation to N and D267 mutation to D | This study |
| pBECKP                     | K.pneumoniae base editing vector, Kmr                                              | 4          |
| pBECKP- <i>lacZ-sc</i>     | pBECKP derivative with <i>lacZ</i> spacer, Q51 mutation to stop codon              | This study |
| pABE- <i>lacZ-cv</i>       | pABE derivative with <i>lacZ</i> spacer, stop codon mutation to Q51                | This study |
| pnCasSA-BEC- $\Delta cntB$ | pnCasSA-BEC derivative with <i>cntB</i> spacer, Q68 mutation to stop codon         | This study |
| pnCasSA-BEC- $\Delta cntC$ | pnCasSA-BEC derivative with <i>cntC</i> spacer, R6 mutation to stop codon          | This study |
| pABE-B56-3                 | pABE derivative with <i>cntB</i> spacer                                            | This study |
| pABE-B56-2                 | pABE derivative with <i>cntB</i> spacer                                            | This study |
| pABE-B4-2                  | pABE derivative with <i>cntB</i> spacer                                            | This study |
| pABE-B8-1                  | pABE derivative with <i>cntB</i> spacer                                            | This study |
| pABE-B4578-1               | pABE derivative with <i>cntB</i> spacer                                            | This study |
| pABE-B7-6                  | pABE derivative with <i>cntB</i> spacer                                            | This study |
| pABE-B467-1                | pABE derivative with <i>cntB</i> spacer                                            | This study |
| pABE-B7-1                  | pABE derivative with <i>cntB</i> spacer                                            | This study |
| pABE-B47-1                 | pABE derivative with <i>cntB</i> spacer                                            | This study |

|                  |                                                          |            |
|------------------|----------------------------------------------------------|------------|
| pABE-B7-4        | pABE derivative with <i>cntB</i> spacer                  | This study |
| pABE-B7-5        | pABE derivative with <i>cntB</i> spacer                  | This study |
| pABE-B7-2        | pABE derivative with <i>cntB</i> spacer                  | This study |
| pABE-B7-3        | pABE derivative with <i>cntB</i> spacer                  | This study |
| pABE-B78-3       | pABE derivative with <i>cntB</i> spacer                  | This study |
| pABE-B46-2       | pABE derivative with <i>cntB</i> spacer                  | This study |
| pABE-B568-1      | pABE derivative with <i>cntB</i> spacer                  | This study |
| pABE-B78-2       | pABE derivative with <i>cntB</i> spacer                  | This study |
| pABE-B456-1      | pABE derivative with <i>cntB</i> spacer                  | This study |
| pABE-B46-1       | pABE derivative with <i>cntB</i> spacer                  | This study |
| pABE-B47-2       | pABE derivative with <i>cntB</i> spacer                  | This study |
| pABE-B57-1       | pABE derivative with <i>cntB</i> spacer                  | This study |
| pABE-B468-1      | pABE derivative with <i>cntB</i> spacer                  | This study |
| pABE-B56-1       | pABE derivative with <i>cntB</i> spacer                  | This study |
| pABE-B567-1      | pABE derivative with <i>cntB</i> spacer                  | This study |
| pABE-C48-1       | pABE derivative with <i>cntC</i> spacer                  | This study |
| pABE-C4-2        | pABE derivative with <i>cntC</i> spacer                  | This study |
| pABE-C46-1       | pABE derivative with <i>cntC</i> spacer                  | This study |
| pABE-C8-1        | pABE derivative with <i>cntC</i> spacer                  | This study |
| pABE-C7-1        | pABE derivative with <i>cntC</i> spacer                  | This study |
| pABE-C47-2       | pABE derivative with <i>cntC</i> spacer                  | This study |
| pABE-C46-4       | pABE derivative with <i>cntC</i> spacer                  | This study |
| pABE-C57-1       | pABE derivative with <i>cntC</i> spacer                  | This study |
| pABE-C46-2       | pABE derivative with <i>cntC</i> spacer                  | This study |
| pABE-C47-1       | pABE derivative with <i>cntC</i> spacer                  | This study |
| pABE-C68-2       | pABE derivative with <i>cntC</i> spacer                  | This study |
| pABE-C457-1      | pABE derivative with <i>cntC</i> spacer                  | This study |
| pABE-C58-1       | pABE derivative with <i>cntC</i> spacer                  | This study |
| pABE-C68-1       | pABE derivative with <i>cntC</i> spacer                  | This study |
| pCasSA           | <i>S.aureus</i> genome editing vector, Kmr, Cmr          | 6          |
| pCasSA-spB7-1    | pCasSA derivative with B7-1 spacer                       | This study |
| pCasSA-spB7-6    | pCasSA derivative with B7-6 spacer                       | This study |
| pCasSA-spC46-2   | pCasSA derivative with C46-2 spacer                      | This study |
| pCasSA-spC8-1    | pCasSA derivative with C8-1 spacer                       | This study |
| pCasSA-V19S      | pCasSA derivative for V19S mutation                      | This study |
| pKOR1-E253A      | pKOR1 derivative for E253A mutation                      | This study |
| pCasSA-C113A     | pCasSA derivative for C113A mutation                     | This study |
| pCasSA-F143A     | pCasSA derivative for F143A mutation                     | This study |
| pABE-C46-4-murR3 | pABE derivative with <i>cntC</i> and <i>murR</i> spacers | This study |

Table S5. Primers used in this study

|                                                        | Name           | Sequence (5'-3')                                                      | Description                                                                                                                                                                                         |
|--------------------------------------------------------|----------------|-----------------------------------------------------------------------|-----------------------------------------------------------------------------------------------------------------------------------------------------------------------------------------------------|
| pABE plasmid construction                              | T7             | TAATACGACTCACTATAG<br>GG                                              | amplification of the ABE gene from plasmid pUC57-ABE7.10                                                                                                                                            |
|                                                        | T7ter          | TGCTAGTTATTGCTCAGC<br>GG                                              | amplification of the ABE gene from plasmid pUC57-ABE7.10                                                                                                                                            |
|                                                        | PCasABEF1      | TAGCGGTGGTAGCAGCG<br>GTGGCAGCGATAAGAAA<br>TACTCAATAGGCTTAGCT<br>ATCGG | amplification of the nCas9 gene and part of <i>S. aureus</i> repF origin from pncasSA-BEC plasmid                                                                                                   |
|                                                        | PCasABER1      | ctgtacgctgtttctcacgcttct                                              | amplification of the nCas9 gene and part <i>S. aureus</i> repF origin from pncasSA-BEC plasmid                                                                                                      |
|                                                        | PCasABEF2      | agaaagcgtgagaaacagcgt<br>acag                                         | amplification of part <i>S. aureus</i> repF origin,<br>chloramphenicol-resistance marker, the origin ColE1 and kanamycin-resistance<br>Marker, sgRNA and the rpsL promoter from pncasSA-BEC plasmid |
|                                                        | PCasABER2      | CATGGCTGAACTCCACTT<br>CGCTCATGTGATATGTCCT<br>CCTCTTCTCACT             | amplification of part <i>S. aureus</i> repF origin,<br>chloramphenicol-resistance marker, the origin ColE1 and kanamycin-resistance<br>Marker, sgRNA and the rpsL promoter from pncasSA-BEC plasmid |
| pABE plasmid construction for multiplex genome editing | sgRNA-F        | catggTCTAGAAGAGTTTG<br>CAAATATACAG                                    | amplification of sgRNA from pABE-murR3 plasmid                                                                                                                                                      |
|                                                        | sgRNA-R        | TCTGACTCGAGCATTTCAT<br>GCGGCCGccatgggtatgg<br>acagatct                | amplification of sgRNA from pABE-murR3 plasmid                                                                                                                                                      |
| <i>agrA</i> gene base editing                          | <i>agrA</i> 1F | gaaaAATGATAGAAGAAA<br>AGCCTA                                          | <i>agrA</i> spacer for its I26 mutation to V                                                                                                                                                        |
|                                                        | <i>agrA</i> 1R | aaacTAGGCTTTTCTTCTA<br>TCATT                                          | <i>agrA</i> spacer for its I26 mutation to V                                                                                                                                                        |
|                                                        | <i>agrA</i> 2F | gaaaCGCAACTGATAATCC<br>TTATG                                          | <i>agrA</i> spacer for its A36 mutation to A                                                                                                                                                        |

|                                           |                   |                               |                                                                 |
|-------------------------------------------|-------------------|-------------------------------|-----------------------------------------------------------------|
|                                           | <i>agrA2R</i>     | aaacCATAAGGATTATCAG<br>TTGCG  | <i>agrA</i> spacer for its A36 mutation to<br>A                 |
|                                           | <i>agrA3F</i>     | gaaaATTCGTAAGCATGA<br>CCCAGT  | <i>agrA</i> spacer for its K77 mutation to<br>E                 |
|                                           | <i>agrA3R</i>     | aaacACTGGGTCATGCTT<br>ACGAAT  | <i>agrA</i> spacer for its K77 mutation to<br>E                 |
|                                           | <i>agrAvF</i>     | ggtgaaggtcgtggttagg           | amplification of the verified <i>agrA</i><br>DNA<br>from genome |
|                                           | <i>agrAvR</i>     | gccagctatacagtcatttg          | amplification of the verified <i>agrA</i><br>DNA<br>from genome |
| <i>murR</i> gene<br>base editing          | <i>murR1F</i>     | gaaaTGATATGACTGTGA<br>ATGATT  | <i>murR</i> spacer for its M37 mutation to<br>V                 |
|                                           | <i>murR1R</i>     | aaacAATCATTACAGTCA<br>TATCA   | <i>murR</i> spacer for its M37 mutation to<br>V                 |
|                                           | <i>murR3F</i>     | gaaaGGCGCATCGAGTTT<br>GACTAT  | <i>murR</i> spacer for its A141 mutation<br>to A                |
|                                           | <i>murR3R</i>     | aaacATAGTCAAACCTCGAT<br>GCGCC | <i>murR</i> spacer for its A141 mutation<br>to A                |
|                                           | <i>murR4F</i>     | gaaaCATCAATTGTTAGAT<br>TTAGT  | <i>murR</i> spacer for its S52 mutation to<br>S                 |
|                                           | <i>murR4R</i>     | aaacACTAAATCTAACAAAT<br>TGATG | <i>murR</i> spacer for its S52 mutation to<br>S                 |
|                                           | <i>murRvF</i>     | ATTGGTGGCGCTGTAATA<br>GG      | amplification of the verified <i>murR</i><br>DNA<br>from genome |
|                                           | <i>murRvR</i>     | CTGTAATGTGTGGCCACC<br>TG      | amplification of the verified <i>murR</i><br>DNA<br>from genome |
| targeting An<br>at different<br>positions | <i>cymR-S2F</i>   | gaaataggtccttaagaaatgc<br>g   | A2 spacer for base editing                                      |
|                                           | <i>cymR-S2R</i>   | aaaccgcatttctaaaggacct<br>a   | A2 spacer for base editing                                      |
|                                           | <i>cntA-S3F</i>   | gaaaGTACCGTTTTTAAA<br>GTCTTT  | A3 spacer for base editing                                      |
|                                           | <i>cntA-S3R</i>   | aaacAAAGACTTTAAAAA<br>CGGTAC  | A3 spacer for base editing                                      |
|                                           | <i>murR-S4F</i>   | gaaaTGGATTGGTTGCAA<br>TATCTT  | A4 spacer for base editing                                      |
|                                           | <i>murR-S4R</i>   | aaacAAGATATTGCAACC<br>AATCCA  | A4 spacer for base editing                                      |
|                                           | <i>cntA-S5-2F</i> | gaaaATTGATCCACCGTAA<br>ACATG  | A5 spacer for base editing                                      |

|                                  |                      |                              |                                                                 |
|----------------------------------|----------------------|------------------------------|-----------------------------------------------------------------|
|                                  | <i>cntA</i> -S5-2R   | aaacCATGTTTACGGTGG<br>ATCAAT | A5 spacer for base editing                                      |
|                                  | <i>murR</i> -S6F     | gaaaCTCGTATTGGCTTAA<br>ATGTC | A6 spacer for base editing                                      |
|                                  | <i>murR</i> -S6R     | aaacGACATTTAAGCCAA<br>TACGAG | A6 spacer for base editing                                      |
|                                  | <i>sasC</i> -S7-6F   | gaaaagttgcacaagcaaaag<br>atc | A7 spacer for base editing                                      |
|                                  | <i>sasC</i> -S7-6R   | aaacgatcttttgcttgcaact       | A7 spacer for base editing                                      |
|                                  | <i>cntA</i> -S8F     | gaaaAGCCTTTACTAGCTA<br>AAAAG | A8 spacer for base editing                                      |
|                                  | <i>cntA</i> -S8R     | aaacCTTTTTAGCTAGTAA<br>AGGCT | A8 spacer for base editing                                      |
|                                  | <i>cntA</i> -S9F     | gaaaTTGTGTTACCTAAT<br>TTAAA  | A9 spacer for base editing                                      |
|                                  | <i>cntA</i> -S9R     | aaacTTTAAATTAGGTGA<br>ACACAA | A9 spacer for base editing                                      |
|                                  | <i>cntA</i> -S10F    | gaaaTTTGCCTTCACAGAT<br>GATAG | A10 spacer for base editing                                     |
|                                  | <i>cntA</i> -S10R    | aaacCTATCATCTGTGAAG<br>GCAAA | A10 spacer for base editing                                     |
|                                  | <i>cymRvF</i>        | ATATTGCGTACTGCCCGA<br>AA     | amplification of the verified <i>cymR</i><br>DNA<br>from genome |
|                                  | <i>cymRvR</i>        | TGCCATAGTGAAACCTCC<br>TTG    | amplification of the verified <i>cymR</i><br>DNA<br>from genome |
|                                  | <i>cntAvF</i>        | GCCAGGCGTACAAGGAT<br>ATG     | amplification of the verified <i>cntA</i><br>DNA<br>from genome |
|                                  | <i>cntAvR</i>        | TGGAAACATGAGCGCAA<br>TAC     | amplification of the verified <i>cntA</i><br>DNA<br>from genome |
|                                  | <i>sasCvF</i>        | tttcttgctgcttgcttg           | amplification of the verified <i>sasC</i><br>DNA<br>from genome |
|                                  | <i>sasCvR</i>        | gtcaggtgaatcaagcagca         | amplification of the verified <i>sasC</i><br>DNA<br>from genome |
| <i>lacZ</i> gene<br>base editing | <i>m-lacZ</i> -S6F   | GAAActattacgccagctggc<br>gaa | <i>lacZ</i> spacer for its R38 mutation to R                    |
|                                  | <i>m-lacZ</i> -S6R   | AAACttcgccagctggcgaat<br>ag  | <i>lacZ</i> spacer for its R38 mutation to R                    |
|                                  | <i>Kp-lacZ</i> -SCvF | tagtCAACAGTTGCGCAG           | <i>lacZ</i> spacer for its Q51 mutation to                      |

|                               |                       |                              |                                                           |
|-------------------------------|-----------------------|------------------------------|-----------------------------------------------------------|
|                               |                       | CCTGAA                       | stop codon                                                |
|                               | Kp- <i>lacZ</i> -SCvR | aaacTTCAGGCTGCGCAA<br>CTGTTG | <i>lacZ</i> spacer for its Q51 mutation to stop codon     |
|                               | <i>lacZ</i> -CVvF     | gaaaCAACTATTGGGAAG<br>GGCGAT | <i>lacZ</i> spacer for its stop codon mutation to Q51     |
|                               | <i>lacZ</i> -CVvR     | aaacATCGCCCTTCCAAT<br>AGTTG  | <i>lacZ</i> spacer for its stop codon mutation to Q51     |
|                               | <i>lacZ</i> vF        | attaatgcagctggcagcagc        | amplification of the verified <i>lacZ</i> DNA from genome |
|                               | <i>lacZ</i> vR        | ccgtaatgggataggtcagc         | amplification of the verified <i>lacZ</i> DNA from genome |
| <i>yagI</i> gene base editing | m- <i>yagI</i> -S6F   | GAAAcctcgacctgttcaacga<br>gc | <i>yagI</i> spacer for its D15 mutation to G              |
|                               | m- <i>yagI</i> -S6R   | AAACgctcgttgaacaggtcg<br>agg | <i>yagI</i> spacer for its D15 mutation to G              |
|                               | <i>yagI</i> vF        | cggctccatttcattgattt         | amplification of the verified <i>yagI</i> DNA from genome |
|                               | <i>yagI</i> vR        | tttgccttctgccgaatac          | amplification of the verified <i>yagI</i> DNA from genome |
| <i>cntB</i> gene base editing | <i>cntB</i> -SC-s9F   | gaaaTATTAATTCAATATAA<br>AAAT | <i>cntB</i> spacer for its Q68 mutation to stop codon     |
|                               | <i>cntB</i> -SC-s9R   | aaacATTTTTATATTGAATT<br>AATA | <i>cntB</i> spacer for its Q68 mutation to stop codon     |
|                               | B7-1F                 | gaaaAAACTTACTACAATC<br>ATCAA | <i>cntB</i> spacer for editing                            |
|                               | B7-1R                 | aaacTTGATGATTGTAGTA<br>AGTTT | <i>cntB</i> spacer for editing                            |
|                               | B56-3F                | gaaaGCGTAATGCTTTACA<br>AGTTG | <i>cntB</i> spacer for editing                            |
|                               | B56-3R                | aaacCAACTTGTAAGCA<br>TTACGC  | <i>cntB</i> spacer for editing                            |
|                               | B56-2F                | gaaaATTGAAGCTATCCAA<br>TATGA | <i>cntB</i> spacer for editing                            |
|                               | B56-2R                | aaacTCATATTGGATAGCT<br>TCAAT | <i>cntB</i> spacer for editing                            |
|                               | B4-2F                 | gaaaACTAGTCCACCCATT<br>ATCAT | <i>cntB</i> spacer for editing                            |
|                               | B4-2R                 | aaacATGATAATGGGTGG<br>ACTAGT | <i>cntB</i> spacer for editing                            |
|                               | B8-1F                 | gaaaAAATGTTAGACGCT<br>CGATGG | <i>cntB</i> spacer for editing                            |
|                               | B8-1R                 | aaacCCATCGAGCGTCTA<br>ACATTT | <i>cntB</i> spacer for editing                            |

|          |                              |                                |
|----------|------------------------------|--------------------------------|
| B4578-1F | gaaaACAATAATTTCAA<br>GTGTTA  | <i>cntB</i> spacer for editing |
| B4578-1R | aaacTAACACTTGAAATTA<br>TTGTT | <i>cntB</i> spacer for editing |
| B7-6F    | gaaaTTATCGAGTATATCT<br>TTGCA | <i>cntB</i> spacer for editing |
| B7-6R    | aaacTGCAAAGATATACTC<br>GATAA | <i>cntB</i> spacer for editing |
| B467-1F  | gaaaGTGACAATTTTACAT<br>GCACA | <i>cntB</i> spacer for editing |
| B467-1R  | aaacTGTGCATGTAAAATT<br>GTCAC | <i>cntB</i> spacer for editing |
| B47-1F   | gaaaATGATTACATCAATT<br>ATTTT | <i>cntB</i> spacer for editing |
| B47-1R   | aaacAAAATAATTGATGTA<br>ATCAT | <i>cntB</i> spacer for editing |
| B7-4F    | gaaaGTAGTTAGTGCATTA<br>AAAAG | <i>cntB</i> spacer for editing |
| B7-4R    | aaacCTTTTTAATGCACTA<br>ACTAC | <i>cntB</i> spacer for editing |
| B7-5F    | gaaaTTGCCGACTTCTGG<br>ATTAAC | <i>cntB</i> spacer for editing |
| B7-5R    | aaacGTTAATCCAGAAGT<br>CGGCAA | <i>cntB</i> spacer for editing |
| B7-2F    | gaaaGAAGCGATGCAATT<br>TAATTT | <i>cntB</i> spacer for editing |
| B7-2R    | aaacAAATTAATTGCATC<br>GCTTC  | <i>cntB</i> spacer for editing |
| B7-3F    | gaaaTTTGGTACAAGCTA<br>CATTAC | <i>cntB</i> spacer for editing |
| B7-3R    | aaacGTAATGTAGCTTGTA<br>CCAAA | <i>cntB</i> spacer for editing |
| B78-3F   | gaaaAAACTTAATTGACCT<br>AGTCC | <i>cntB</i> spacer for editing |
| B78-3R   | aaacGGACTAGGTCAATT<br>AAGTTT | <i>cntB</i> spacer for editing |
| B46-2F   | gaaaAGCATATGTATTAAT<br>TGTAG | <i>cntB</i> spacer for editing |
| B46-2R   | aaacCTACAATTAATACAT<br>ATGCT | <i>cntB</i> spacer for editing |
| B568-1F  | gaaaGACCAATACGTTCA<br>GCAACT | <i>cntB</i> spacer for editing |
| B568-1R  | aaacAGTTGCTGAACGTA<br>TTGGTC | <i>cntB</i> spacer for editing |

|                                  |                     |                              |                                                              |
|----------------------------------|---------------------|------------------------------|--------------------------------------------------------------|
|                                  | B78-2F              | gaaaACTGGCAATATGTAA<br>CTTTC | <i>cntB</i> spacer for editing                               |
|                                  | B78-2R              | aaacGAAAGTTACATATTG<br>CCAGT | <i>cntB</i> spacer for editing                               |
|                                  | B456-1F             | gaaaTCTAAAGTAAATACC<br>AGCAT | <i>cntB</i> spacer for editing                               |
|                                  | B456-1R             | aaacATGCTGGTATTTACT<br>TTAGA | <i>cntB</i> spacer for editing                               |
|                                  | B46-1F              | gaaaTCTATACCAATGATA<br>ATGGG | <i>cntB</i> spacer for editing                               |
|                                  | B46-1R              | aaacCCCATTATCATTGGT<br>ATAGA | <i>cntB</i> spacer for editing                               |
|                                  | B47-2F              | gaaaGTTATTACGATTGCC<br>TATGC | <i>cntB</i> spacer for editing                               |
|                                  | B47-2R              | aaacGCATAGGCAATCGT<br>AATAAC | <i>cntB</i> spacer for editing                               |
|                                  | B57-1F              | gaaaGAGTATATCTTTGCA<br>TGGCC | <i>cntB</i> spacer for editing                               |
|                                  | B57-1R              | aaacGGCCATGCAAAGAT<br>ATACTC | <i>cntB</i> spacer for editing                               |
|                                  | B468-1F             | gaaaAATACATATGCTTGA<br>ATGAC | <i>cntB</i> spacer for editing                               |
|                                  | B468-1R             | aaacGTCATTCAAGCATAT<br>GTATT | <i>cntB</i> spacer for editing                               |
|                                  | B56-1F              | gaaaTATTAATTCAATATAA<br>AAAT | <i>cntB</i> spacer for editing                               |
|                                  | B56-1R              | aaacATTTTTATATTGAATT<br>AATA | <i>cntB</i> spacer for editing                               |
|                                  | B567-1F             | gaaaGCAGAAACGAATGA<br>GAAGTA | <i>cntB</i> spacer for editing                               |
|                                  | B567-1R             | aaacTACTTCTCATTCGTT<br>TCTGC | <i>cntB</i> spacer for editing                               |
|                                  | <i>cntBvF</i>       | GTATTGCGCTCATGTTTC<br>CA     | amplification of the verified <i>cntB</i><br>DNA from genome |
|                                  | <i>cntBvR</i>       | TCGCACGATCAGTGAAC<br>TT      | amplification of the verified <i>cntB</i><br>DNA from genome |
|                                  | <i>cntBvF(T)</i>    | CGGTAAAGAGCGTTCAG<br>ACG     | amplification of the verified <i>cntB</i><br>DNA from genome |
| <i>cntC</i> gene<br>base editing | <i>cntC</i> -SC-s4F | gaaaAAACGATTATTACAA<br>GATAA | <i>cntC</i> spacer for its R6 mutation to<br>stop codon      |
|                                  | <i>cntC</i> -SC-s4R | aaacTTATCTTGTAATAATC<br>GTTT | <i>cntC</i> spacer for its R6 mutation to<br>stop codon      |
|                                  | C48-1F              | gaaaGGCATTATTTTGAC<br>GCGTT  | <i>cntC</i> spacer for editing                               |



|         |                              |                                |
|---------|------------------------------|--------------------------------|
| C48-1R  | aaacAACGCGTCAAATA<br>AATGCC  | <i>cntC</i> spacer for editing |
| C4-2F   | gaaaTCTATTTTAGGATTC<br>TTATC | <i>cntC</i> spacer for editing |
| C4-2R   | aaacGATAAGAATCCTAA<br>AATAGA | <i>cntC</i> spacer for editing |
| C46-1F  | gaaaGATACAGCAAACAA<br>ATTGTC | <i>cntC</i> spacer for editing |
| C46-1R  | aaacGCAAATTTGTTTGCT<br>GTATC | <i>cntC</i> spacer for editing |
| C8-1F   | gaaaAAATGCCATGATAAT<br>ATTTT | <i>cntC</i> spacer for editing |
| C8-1R   | aaacAAAATATTATCATGG<br>CATTT | <i>cntC</i> spacer for editing |
| C7-1F   | gaaaGTACTTATTGGATCT<br>ATTTT | <i>cntC</i> spacer for editing |
| C7-1R   | aaacAAAATAGATCCAATA<br>AGTAC | <i>cntC</i> spacer for editing |
| C47-2F  | gaaaATAATCACTATGGCA<br>ATACC | <i>cntC</i> spacer for editing |
| C47-2R  | aaacGGTATTGCCATAGTG<br>ATTAT | <i>cntC</i> spacer for editing |
| C46-4F  | gaaaGCAATATCTGCTAAT<br>GTTAA | <i>cntC</i> spacer for editing |
| C46-4R  | aaacTTAACATTAGCAGAT<br>ATTGC | <i>cntC</i> spacer for editing |
| C57-1F  | gaaaTGCCATAGTGATTAT<br>AGTGA | <i>cntC</i> spacer for editing |
| C57-1R  | aaacTCACTATAATCACTAT<br>GGCA | <i>cntC</i> spacer for editing |
| C46-2F  | gaaaATCACACGCACGCA<br>TGATTA | <i>cntC</i> spacer for editing |
| C46-2R  | aaacTAATCATGCGTGCGT<br>GTGAT | <i>cntC</i> spacer for editing |
| C47-1F  | gaaaTCAATGATCTTGCAA<br>ATATC | <i>cntC</i> spacer for editing |
| C47-1R  | aaacGATATTTGCAAGATC<br>ATTGA | <i>cntC</i> spacer for editing |
| C68-2F  | gaaaTAGGTAGAGATATTT<br>TAACT | <i>cntC</i> spacer for editing |
| C68-2R  | aaacAGTTAAAATATCTCT<br>ACCTA | <i>cntC</i> spacer for editing |
| C457-1F | gaaaACAAAGACATATAA<br>CAAAC  | <i>cntC</i> spacer for editing |

|                           |                  |                                                                  |                                                                       |
|---------------------------|------------------|------------------------------------------------------------------|-----------------------------------------------------------------------|
|                           | C457-1R          | aaacAGTTTGTATATGTC<br>TTTGT                                      | <i>cntC</i> spacer for editing                                        |
|                           | C58-1F           | gaaTGCCATCACTATAAT<br>CACTA                                      | <i>cntC</i> spacer for editing                                        |
|                           | C58-1R           | aaacTAGTGATTATAGTGA<br>TGGCA                                     | <i>cntC</i> spacer for editing                                        |
|                           | C68-1F           | gaaGGATCATAAAATGTC<br>ACAAG                                      | <i>cntC</i> spacer for editing                                        |
|                           | C68-1R           | aaacCTTGTGACATTTTAT<br>GATCC                                     | <i>cntC</i> spacer for editing                                        |
|                           | <i>CntCvF</i>    | TATCTTGCATGGCCTGG<br>AC                                          | amplification of the verified <i>cntC</i><br>DNA from genome          |
|                           | <i>CntCvR</i>    | TGAAAACATGCCAGC<br>AAA                                           | amplification of the verified <i>cntC</i><br>DNA from genome          |
|                           | <i>CntCvR(T)</i> | ACGAGTGGTTGATCTGTC<br>CA                                         | amplification of the verified <i>cntC</i><br>DNA from genome          |
| CntB V19<br>mutation to S | sp-B7-1-2F       | gaaCTGAACGCTCTTTAC<br>CGTTT                                      | <i>cntB</i> spacer for point mutation                                 |
|                           | sp-B7-1-2R       | aaacAAACGGTAAAGAGC<br>GTTCAAG                                    | <i>cntB</i> spacer for point mutation                                 |
|                           | SAupB71F         | tttgagatctgtccataccatgg<br>TCTAGACACGGTTGAATT<br>GAATTTGAAAGAAGC | amplification of ~1kb <i>cntB</i> upstream<br>for V19 mutation to S   |
|                           | B71upR           | TTTACCGTTTTGTATTTTA<br>AATGCGT                                   | amplification of ~1kb <i>cntB</i> upstream<br>for V19 mutation to S   |
|                           | B71dnF           | ACGCATTAAAATACAAA<br>ACGGTAAA                                    | amplification of ~1kb <i>cntB</i><br>downstream for V19 mutation to S |
|                           | SAdnB71R         | aagatacaggtatattttctga<br>CTCGAGAATCGTGTCAA<br>GTATTGCTTTTAACTT  | amplification of ~1kb <i>cntB</i><br>downstream for V19 mutation to S |
|                           | V19SF            | TGTTCCATTGATGATTGT<br>ATCAAGTTTATGACATT<br>CTAT                  | primer for point mutation V19<br>mutation to S                        |
|                           | V19SR            | AACTTGATACAATCATCA<br>ATGGAAACATGAGCGCA<br>AT                    | primer for point mutation V19<br>mutation to S                        |

|                         |            |                                                                               |                                                                     |
|-------------------------|------------|-------------------------------------------------------------------------------|---------------------------------------------------------------------|
| CntB E253 mutation to A | B76tempF   | CAACTTTGTACAAAAAA<br>GCAGGCTCATTGAAAC<br>AAATTGATGATGAAGGTA                   | amplification of ~1kb <i>cntB</i> upstream for E253 mutation to A   |
|                         | B76upR-neo | GTCCACCCATTATCATTG<br>GTATAGACATACAAAAGA<br>TTGATACCGCAACTTGTA<br>AAGCATTACGC | amplification of ~1kb <i>cntB</i> upstream for E253 mutation to A   |
|                         | B76dnF-neo | CCAATGATAATGGGTGGA<br>CTAGTTGTTATCGAGTAT                                      | amplification of ~1kb <i>cntB</i> downstream for E253 mutation to A |
|                         | B76tempR   | TGCCAACTTTGTACAAAA<br>AAGCTGCCAGGTATCTGT<br>AATCGTCAAATGTT                    | amplification of ~1kb <i>cntB</i> downstream for E253 mutation to A |
|                         | pKOR1F     | AACATTGACGATTACAG<br>ATACCTGGCAGCTTTTTT<br>GTACAAAGTTGGCA                     | amplification of ~8kb pKOR1 backbone                                |
|                         | pKOR1R     | TACCTTCATCAATTTG<br>TTTCAAATGAGCCTGCT<br>TTTTTGTACAAAGTTG                     | amplification of ~8kb pKOR1 backbone                                |
| CntC C113 mutation to A | C46-2F     | gaaaATCACACGCACGCA<br>TGATTA                                                  | <i>cntC</i> spacer for point mutation                               |
|                         | C46-2R     | aaacTAATCATGCGTGCGT<br>GTGAT                                                  | <i>cntC</i> spacer for point mutation                               |
|                         | SAupC462F  | ttgagatctgtccatccatgg<br>TCTAGAGACCCAGTTGCT<br>GAACGTATTG                     | amplification of ~1kb <i>cntC</i> upstream for C113 mutation to A   |
|                         | C462upR    | ACATCAGCCGCACGCATG<br>ATTAATGCGTCAA                                           | amplification of ~1kb <i>cntC</i> upstream for C113 mutation to A   |
|                         | C462dnF    | TTGACGCATTAATCATGC<br>GTGCGGCTGATGT                                           | amplification of ~1kb <i>cntC</i> downstream for C113 mutation to A |
|                         | SAdnC462R  | aagatacaggtatattttctga<br>CTCGAGACATTCTCTCTG<br>ATAACATGTAAGGG                | amplification of ~1kb <i>cntC</i> downstream for C113 mutation to A |
| CntC F143 mutation to A | C8-1F      | gaaaAAATGCCATGATAAT<br>ATTTT                                                  | <i>cntC</i> spacer for point mutation                               |
|                         | C8-1R      | aaacAAAATATTATCATGG<br>CATT                                                   | <i>cntC</i> spacer for point mutation                               |
|                         | SAupC81F   | ttgagatctgtccatccatgg<br>TCTAGACATCAATTATTTT<br>AGGTGTAGTTAGTGCA              | amplification of ~1kb <i>cntC</i> upstream for F143 mutation to A   |
|                         | C81upR     | TCAAAATAGCTGCCATGA<br>TAATATTTCCGCACC                                         | amplification of ~1kb <i>cntC</i> upstream for F143 mutation to A   |
|                         | C81dnF     | GGTGCGGAAAATATTATC                                                            | amplification of ~1kb <i>cntC</i>                                   |

|                            |                       |                                                                |                                                                                               |
|----------------------------|-----------------------|----------------------------------------------------------------|-----------------------------------------------------------------------------------------------|
|                            |                       | ATGGCAGCTATTTTGA                                               | downstream for F143 mutation to A                                                             |
|                            | SAdnC81R              | aagatacaggtatatttttctga<br>CTCGAGTAATTGTATCTA<br>AAGCCGTTGTCGG | amplification of ~1kb <i>cntC</i><br>downstream for F143 mutation to A                        |
| High-throughput sequencing | C1- <i>cntA</i> 8WT-F | AGCAGATACGGTGGATC<br>AATGTCTGC                                 | amplification of 183bp DNA<br>fragment of <i>cntA</i> (WT) for high-throughput sequencing     |
|                            | C2- <i>cntA</i> 8WT-F | AGCAGGTACGGTGGATC<br>AATGTCTGC                                 | amplification of 183bp DNA<br>fragment of <i>cntA</i> (WT) for high-throughput sequencing     |
|                            | C3- <i>cntA</i> 8WT-F | AGCAGCTACGGTGGATC<br>AATGTCTGC                                 | amplification of 183bp DNA<br>fragment of <i>cntA</i> (WT) for high-throughput sequencing     |
|                            | C- <i>cntA</i> 8WT-R  | AACTGCGTCAGCATCAAA<br>TG                                       | amplification of 183bp DNA<br>fragment of <i>cntA</i> (WT) for high-throughput sequencing     |
|                            | D1- <i>cntA</i> 8-F   | CATTCATACGGTGGATCA<br>ATGTCTGC                                 | amplification of 183bp DNA<br>fragment of <i>cntA</i> (edited) for high-throughput sequencing |
|                            | D2- <i>cntA</i> 8-F   | CATTCGTACGGTGGATCA<br>ATGTCTGC                                 | amplification of 183bp DNA<br>fragment of <i>cntA</i> (edited) for high-throughput sequencing |
|                            | D3- <i>cntA</i> 8-F   | CATTCCTACGGTGGATCA<br>ATGTCTGC                                 | amplification of 183bp DNA<br>fragment of <i>cntA</i> (edited) for high-throughput sequencing |
|                            | D- <i>cntA</i> 8-R    | AACTGCGTCAGCATCAAA<br>TG                                       | amplification of 183bp DNA<br>fragment of <i>cntA</i> (edited) for high-throughput sequencing |
|                            | G1- <i>murR</i> 6WT-F | GCATCATGTTGAAAAATG<br>CCAGGACA                                 | amplification of 235bp DNA<br>fragment of <i>murR</i> (WT) for high-throughput sequencing     |
|                            | G2- <i>murR</i> 6WT-F | GCATCGTGTGAAAAATG<br>CCAGGACA                                  | amplification of 235bp DNA<br>fragment of <i>murR</i> (WT) for high-throughput sequencing     |
|                            | G3- <i>murR</i> 6WT-F | GCATCCTGTTGAAAAATG<br>CCAGGACA                                 | amplification of 235bp DNA<br>fragment of <i>murR</i> (WT) for high-throughput sequencing     |
|                            | G- <i>murR</i> 6WT-R  | CTGTAATGTGTGCCACC<br>TG                                        | amplification of 235bp DNA<br>fragment of <i>murR</i> (WT) for high-throughput sequencing     |
|                            | H1- <i>murR</i> 6-F   | ATTGGATGTTGAAAAATG<br>CCAGGACA                                 | amplification of 235bp DNA<br>fragment of <i>murR</i> (edited) for high-throughput sequencing |
|                            | H2- <i>murR</i> 6-F   | ATTGGGTGTTGAAAAAT                                              | amplification of 235bp DNA                                                                    |

|               |  |                                 |                                                                                            |
|---------------|--|---------------------------------|--------------------------------------------------------------------------------------------|
|               |  | GCCAGGACA                       | fragment of <i>murR</i> (edited) for high-throughput sequencing                            |
| H3-murR6-F    |  | ATTGGCTGTTGAAAAATG<br>CCAGGACA  | amplification of 235bp DNA fragment of <i>murR</i> (edited) for high-throughput sequencing |
| H-murR6-R     |  | CTGTAATGTGTGGCCACCTG            | amplification of 235bp DNA fragment of <i>murR</i> (edited) for high-throughput sequencing |
| I1-murR3WT-F  |  | CACATATATGGATGCGCA<br>AATTGATG  | amplification of 189bp DNA fragment of <i>murR</i> (WT) for high-throughput sequencing     |
| I2-murR3WT-F  |  | CACATGTATGGATGCGCA<br>AATTGATG  | amplification of 189bp DNA fragment of <i>murR</i> (WT) for high-throughput sequencing     |
| I3-murR3WT-F  |  | CACATCTATGGATGCGCA<br>AATTGATG  | amplification of 189bp DNA fragment of <i>murR</i> (WT) for high-throughput sequencing     |
| I-murR3WT-R   |  | CTATCATCATGCGTCGCA<br>AA        | amplification of 189bp DNA fragment of <i>murR</i> (WT) for high-throughput sequencing     |
| J1-murR3-F    |  | GTTCAATATGGATGCGCA<br>AATTGATG  | amplification of 189bp DNA fragment of <i>murR</i> (edited) for high-throughput sequencing |
| J2-murR3-F    |  | GTTCAAGTATGGATGCGCA<br>AATTGATG | amplification of 189bp DNA fragment of <i>murR</i> (edited) for high-throughput sequencing |
| J3-murR3-F    |  | GTTCACTATGGATGCGCA<br>AATTGATG  | amplification of 189bp DNA fragment of <i>murR</i> (edited) for high-throughput sequencing |
| J-MurR3-R     |  | CTATCATCATGCGTCGCA<br>AA        | amplification of 189bp DNA fragment of <i>murR</i> (edited) for high-throughput sequencing |
| K1-cntC57WT-F |  | AGATTAAGGTGTCAAAG<br>CGCCTACTG  | amplification of 220bp DNA fragment of <i>cntC</i> (WT) for high-throughput sequencing     |
| K2-cntC57WT-F |  | AGATTGAGGTGTCAAAG<br>CGCCTACTG  | amplification of 220bp DNA fragment of <i>cntC</i> (WT) for high-throughput sequencing     |
| K3-cntC57WT-F |  | AGATTCAGGTGTCAAAG<br>CGCCTACTG  | amplification of 220bp DNA fragment of <i>cntC</i> (WT) for high-throughput sequencing     |
| K-cntC57WT-R  |  | TCATGATTGCACCACTCC<br>TT        | amplification of 220bp DNA fragment of <i>cntC</i> (WT) for high-throughput sequencing     |

|  |             |                                |                                                                                            |
|--|-------------|--------------------------------|--------------------------------------------------------------------------------------------|
|  | K1-cntC57-F | CCAATAAGGTGTCAAAG<br>CGCCTACTG | amplification of 220bp DNA fragment of <i>cntC</i> (edited) for high-throughput sequencing |
|  | K2-cntC57-F | CCAATGAGGTGTCAAAG<br>CGCCTACTG | amplification of 220bp DNA fragment of <i>cntC</i> (edited) for high-throughput sequencing |
|  | K3-cntC57-F | CCAATCAGGTGTCAAAG<br>CGCCTACTG | amplification of 220bp DNA fragment of <i>cntC</i> (edited) for high-throughput sequencing |
|  | K-cntC57-R  | TCATGATTGCACCACTCC<br>TT       | amplification of 220bp DNA fragment of <i>cntC</i> (edited) for high-throughput sequencing |

## 4 Supporting References

- [1] T. Gu, S. Zhao, Y. Pi, W. Chen, C. Chen, Q. Liu, M. Li, D. Han, Q. Ji, *Chem Sci*, 2018, **9**, 3248-3253.
- [2] I. R. Monk, J. J. Tree, B. P. Howden, T. P. Stinear, T. J. Foster, *mBio*, 2016, **7**, e00171.
- [3] M. G. Kluesner, D. A. Nedveck, W. S. Lahr, J. R. Garbe, J. E. Abrahante, B. R. Webber, B. S. Moriarity, *CRISPR J*, 2018, **1**, 239-250.
- [4] Y. Wang, S. Wang, W. Chen, L. Song, Y. Zhang, Z. Shen, F. Yu, M. Li, Q. Ji, *Appl Environ Microbiol*, 2018, **84**.
- [5] T. Bae, O. Schneewind, *Plasmid*, 2006, **55**, 58-63.
- [6] W. Chen, Y. Zhang, W. S. Yeo, T. Bae, Q. Ji, *J Am Chem Soc*, 2017, **139**, 3790-3795.
- [7] G. Ghssein, C. Brutesco, L. Ouerdane, C. Fojcik, A. Izaute, S. Wang, C. Hajjar, R. Lobinski, D. Lemaire, P. Richaud, R. Voulhoux, A. Espaillet, F. Cava, D. Pignol, E. Borezee-Durant, P. Arnoux, *Science*, 2016, **352**, 1105-1109.
- [8] L. Zimmermann, A. Stephens, S. Z. Nam, D. Rau, J. Kubler, M. Lozajic, F. Gabler, J. Soding, A. N. Lupas, V. Alva, *J Mol Biol*, 2018, **430**, 2237-2243.
